# Supplementary material
Source: Springer Nature journal article supplement (https://www.springermedizin.de/resource/supplementary/13031_2014_146_MOESM2_ESM.pdf/9645222)

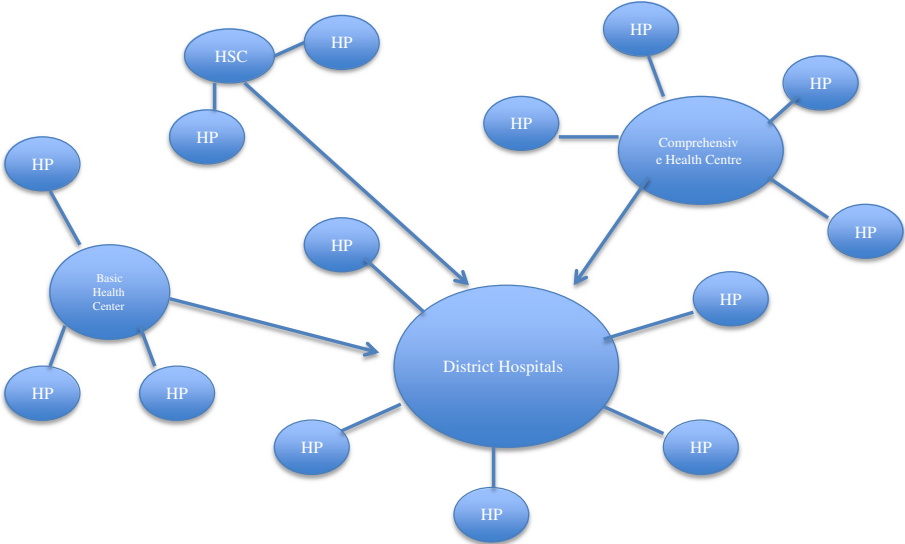

Supplement: MOESM2 [file 9645222]
